# Supplementary material
Source: PubMed Central journal article supplement (PMC6606359)
Supplement: NIHMS1526281-supplement-7.pdf [file NIHMS1526281-supplement-7.pdf]

|                                                   | <b>Overall<br/>(n=24)</b> | <b>Low<br/>clonality<br/>(n=12)</b> | <b>High<br/>clonality<br/>(n=12)</b> | <b>p<br/>value</b> |
|---------------------------------------------------|---------------------------|-------------------------------------|--------------------------------------|--------------------|
| <b>Demographics</b>                               |                           |                                     |                                      |                    |
| Mean age, years (SD)                              | 65.3 (11.2)               | 66.9 (11.0)                         | 63.7 (11.6)                          | 0.51               |
| Female, n (%)                                     | 7 (29.1)                  | 5 (41.7)                            | 2 (16.7)                             | 0.37               |
| Caucasian, n (%)                                  | 22 (91.6)                 | 12 (100)                            | 10 (83.3)                            | 0.47               |
| <b>Clinical characteristics</b>                   |                           |                                     |                                      |                    |
| Mean BMI, kg/m <sup>2</sup> (SD)                  | 27.2 (4.7)                | 24.9 (3.2)                          | 29.4 (5.0)                           | <b>0.02</b>        |
| Mean smoking pack years (SD)                      | 10.6 (16.5)               | 10.4 (16.6)                         | 10.7 (17.3)                          | 0.95               |
| Diabetes, n (%)                                   | 12 (50.0)                 | 3 (25.0)                            | 9 (75.0)                             | <b>0.03</b>        |
| Pre-operative biliary stent, n (%)                | 18 (75.0)                 | 10 (83.3)                           | 8 (66.7)                             | 0.64               |
| Mean pre-operative CA 19-9, u/mL (SD)             | 509.7 (673.5)             | 685.4 (858.2)                       | 334.1 (380.4)                        | 0.20               |
| Mean maximum tumor dimension, cm (SD)             | 3.3 (1.2)                 | 3.2 (1.1)                           | 3.4 (1.4)                            | 0.68               |
| Vascular resection, n (%)                         | 6 (25.0)                  | 4 (33.3)                            | 2 (16.7)                             | 0.64               |
| R0 resection, n (%)                               | 15 (62.5)                 | 6 (50.0)                            | 9 (75.0)                             | 0.40               |
| T stage 2, n (%)                                  | 3 (12.5)                  | 2 (16.7)                            | 1 (8.3)                              | 1.0                |
| T stage 3, n (%)                                  | 21 (87.5)                 | 10 (83.3)                           | 11 (91.7)                            | 1.0                |
| N stage 1, n (%)                                  | 20 (83.3)                 | 11 (91.7)                           | 9 (75.0)                             | 0.59               |
| Mean percentage of node positivity (SD)           | 17.6 (13.9)               | 19.9 (15.7)                         | 15.3 (12.2)                          | 0.43               |
| Poorly differentiated tumor, n (%)                | 2 (10.0)                  | 1 (9.0)                             | 1 (11.1)                             | 1.0                |
| Lymphovascular invasion, n (%)                    | 10 (66.7)                 | 5 (71.4)                            | 5 (62.5)                             | 1.0                |
| Perineural invasion, n (%)                        | 14 (87.5)                 | 7 (87.5)                            | 7 (87.5)                             | 1.0                |
| Adjuvant chemotherapy, n (%)                      | 21 (91.3)                 | 12 (100)                            | 9 (81.8)                             | 0.21               |
| Adjuvant radiation, n (%)                         | 7 (53.8)                  | 4 (57.1)                            | 3 (50.0)                             | 1.0                |
| <b>Outcomes</b>                                   |                           |                                     |                                      |                    |
| Mean time to post-operative recurrence, days (SD) | 416.0 (307.4)             | 436.0 (324.5)                       | 393.8 (305.0)                        | 0.77               |
| Mean overall survival, days (SD)                  | 1062.4 (826.3)            | 1246.9 (1012.9)                     | 878.7 (572.9)                        | 0.28               |
