# Supplementary material
Source: PubMed Central journal article supplement (PMC6606359)

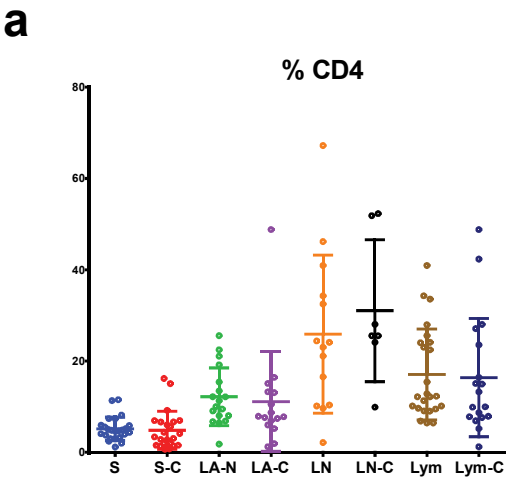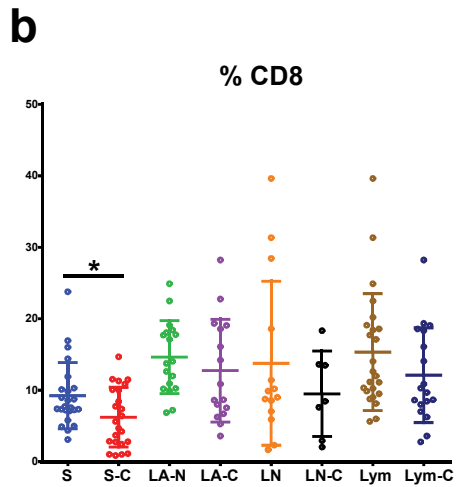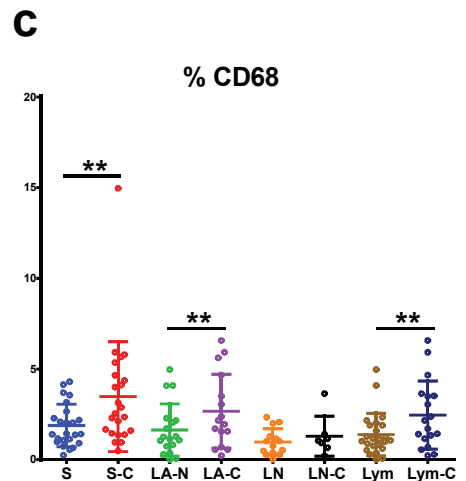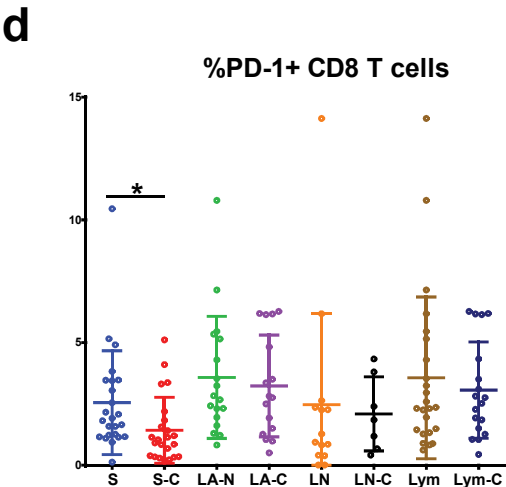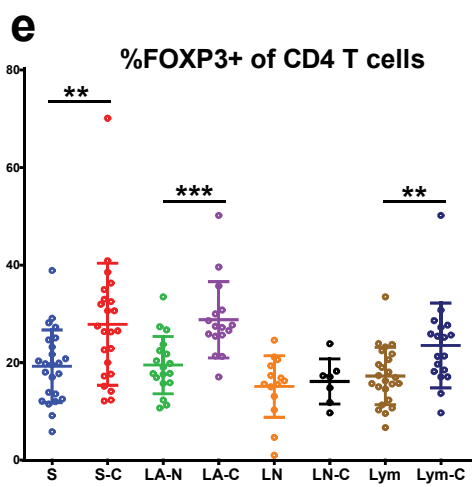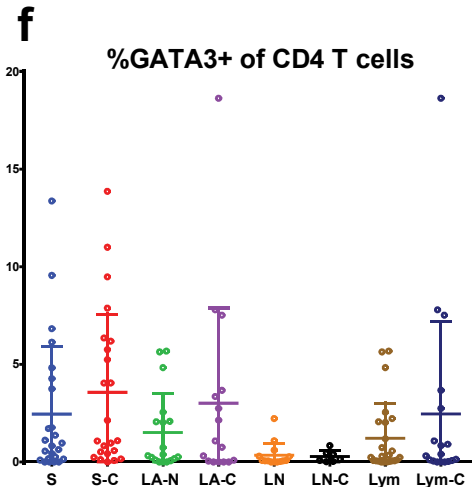

Supplement: NIHMS1526281-supplement-1.pdf [file NIHMS1526281-supplement-1.pdf]

a

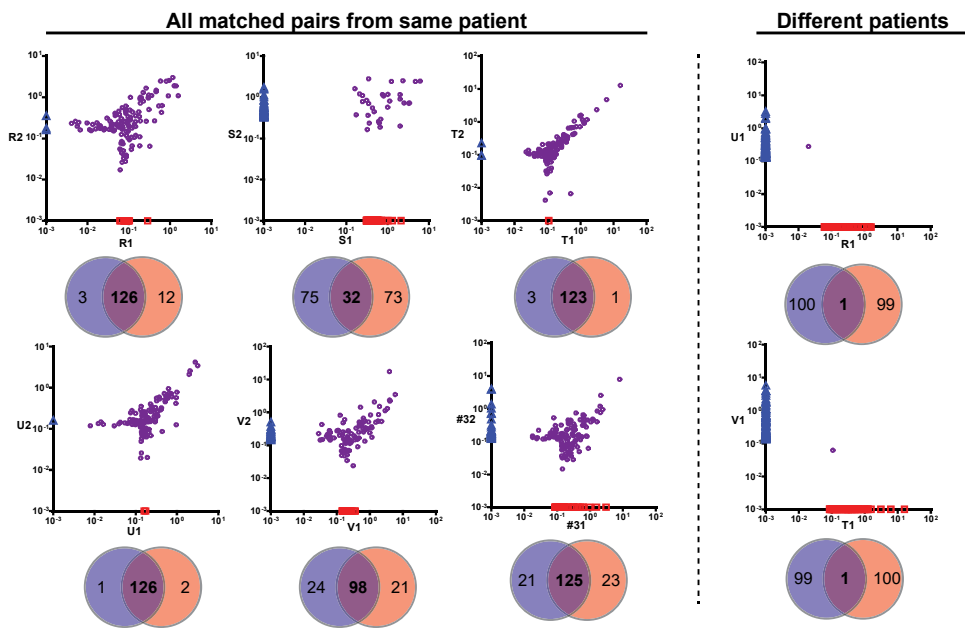

b

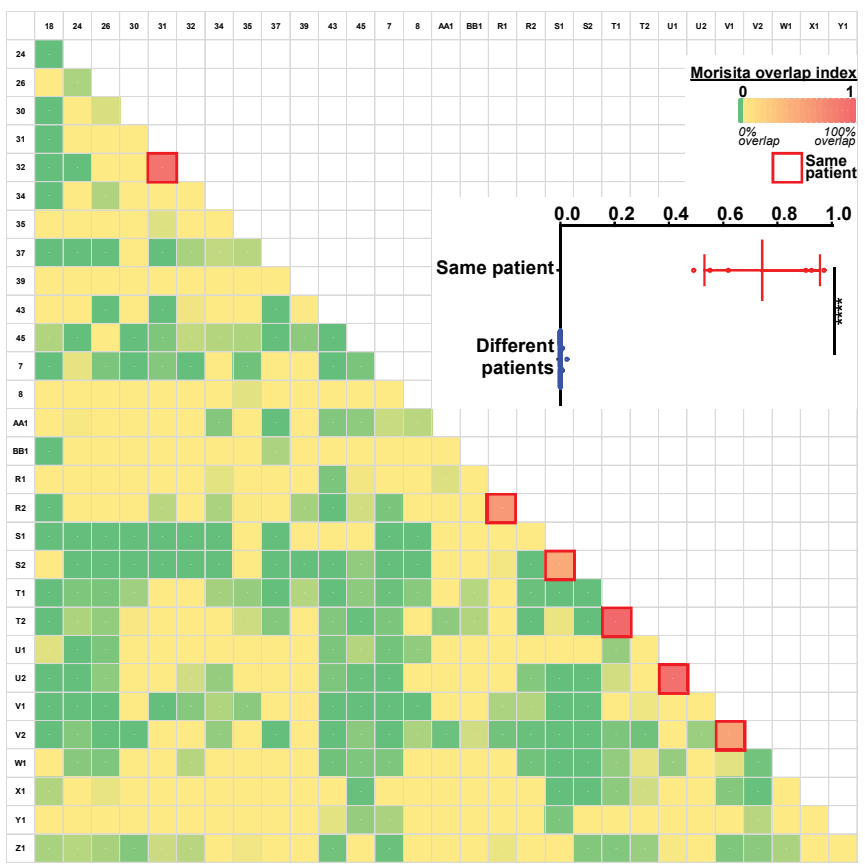

Supplement: NIHMS1526281-supplement-2.pdf [file NIHMS1526281-supplement-2.pdf]

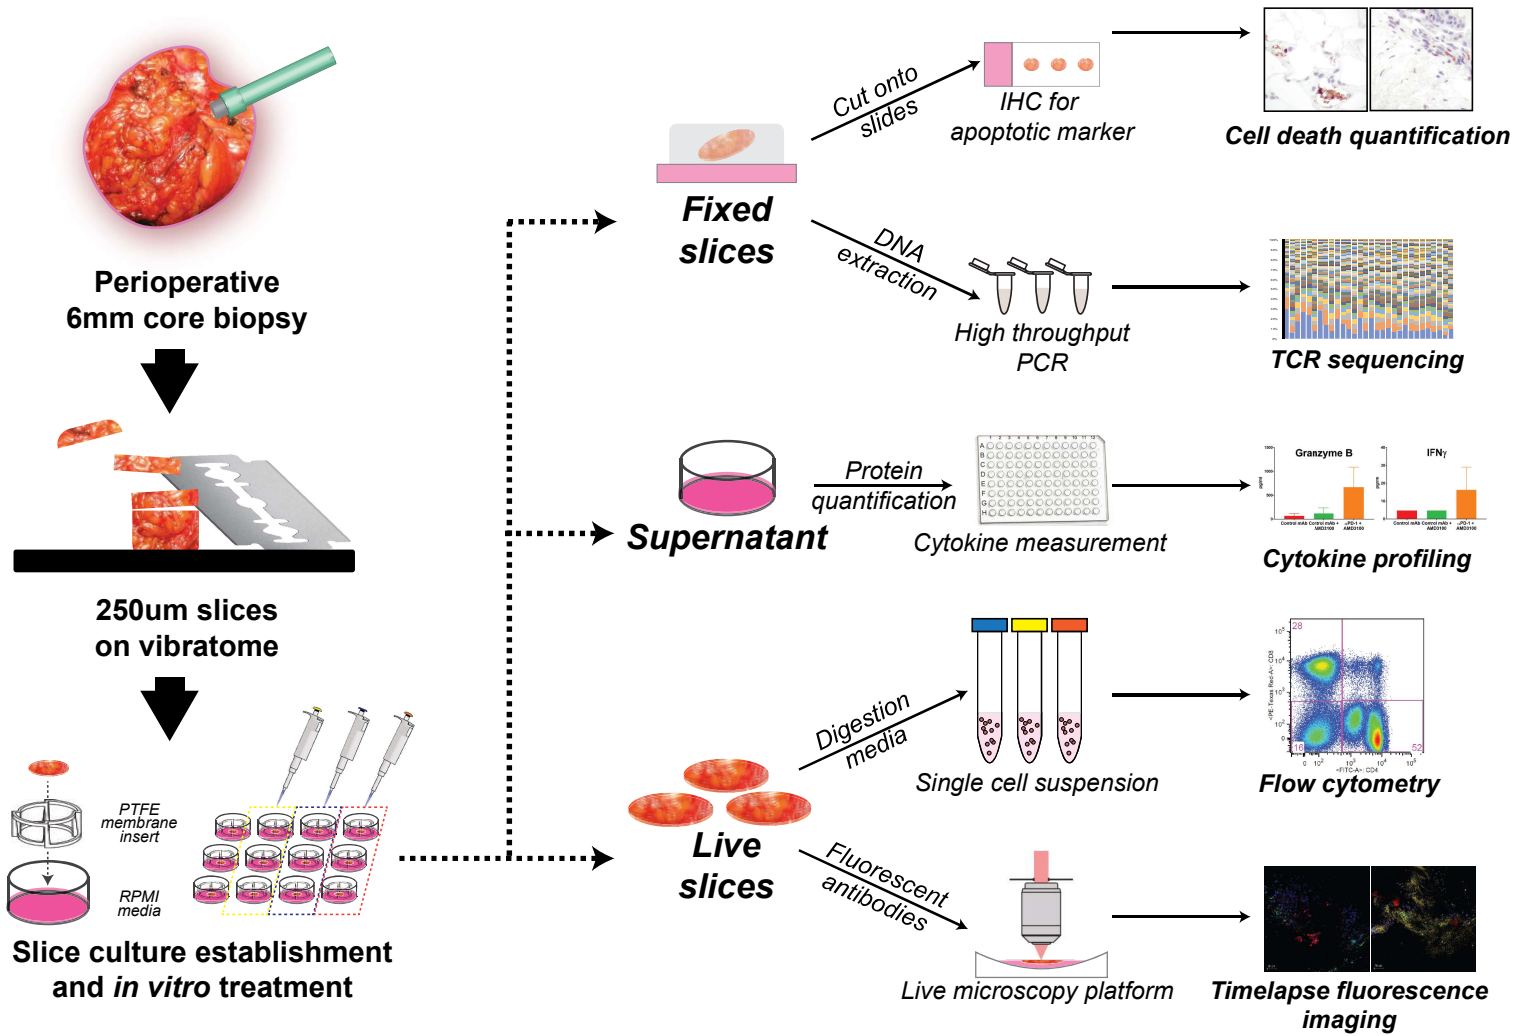

Supplement: NIHMS1526281-supplement-3.pdf [file NIHMS1526281-supplement-3.pdf]

**a** Apoptosis in slice culture

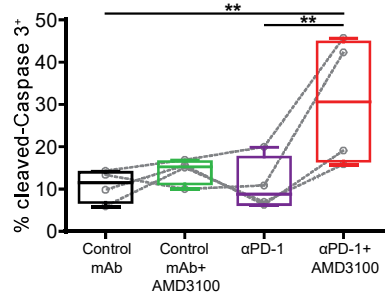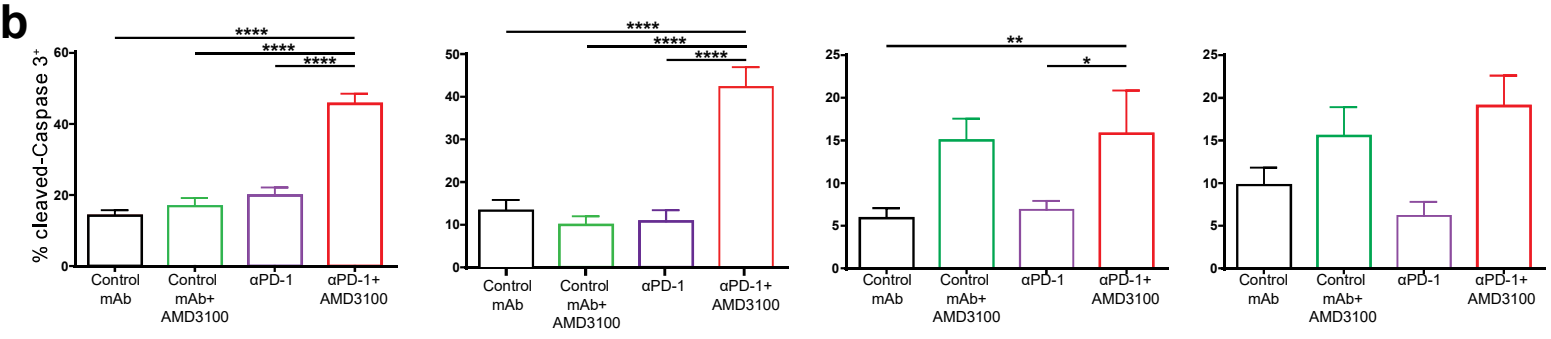

**c** % CD45+ by flow cytometry

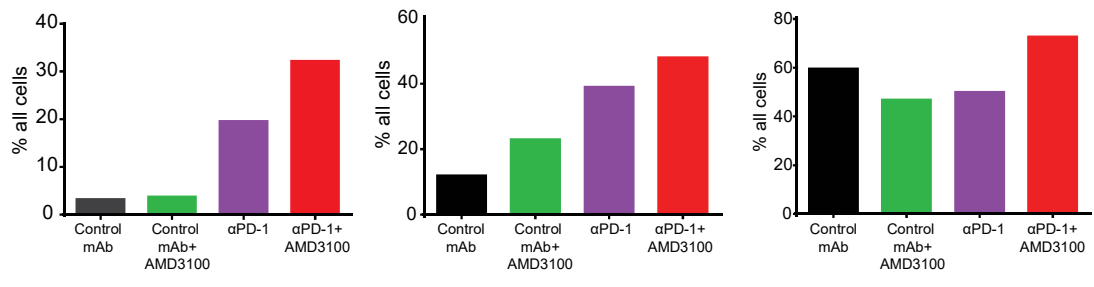

Supplement: NIHMS1526281-supplement-4.pdf [file NIHMS1526281-supplement-4.pdf]

**a**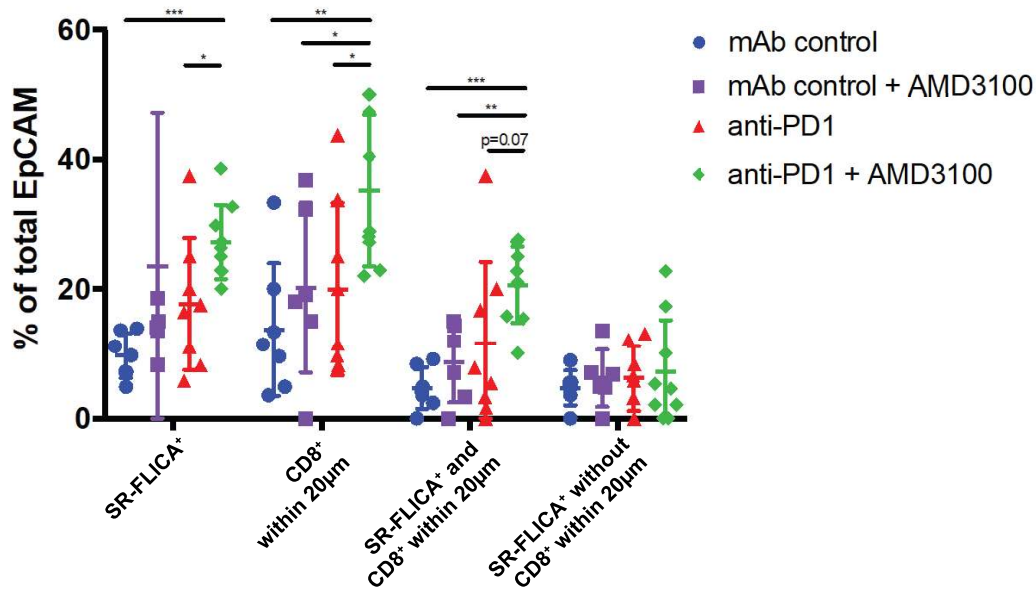**b**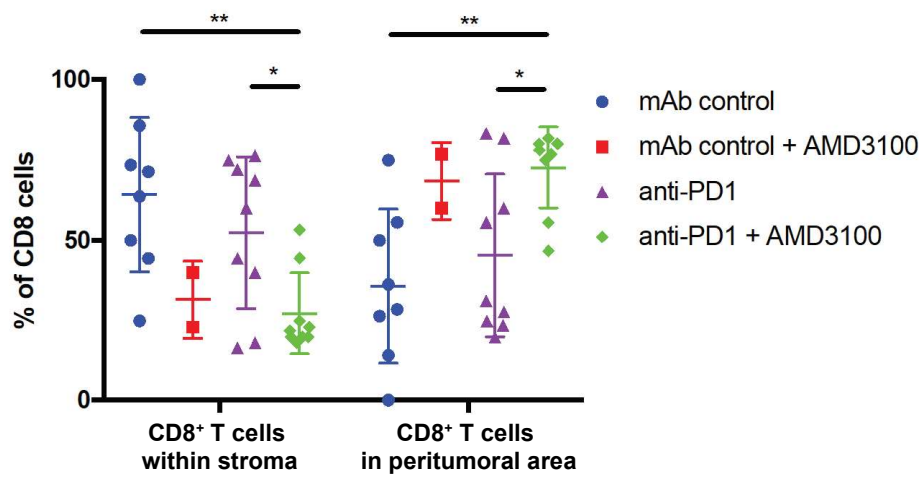**c**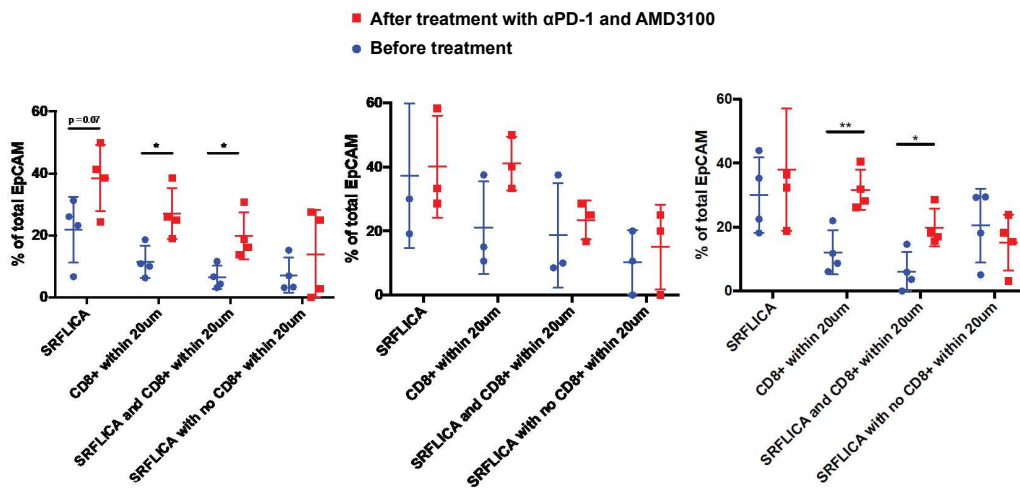**d**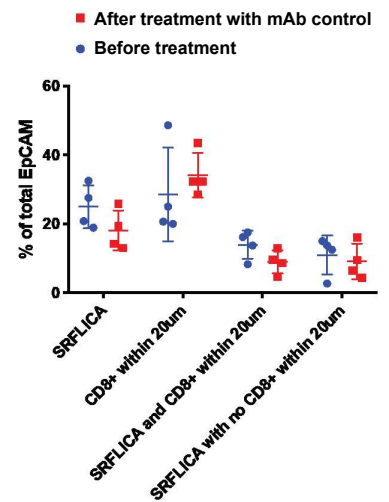

Supplement: NIHMS1526281-supplement-5.pdf [file NIHMS1526281-supplement-5.pdf]
